# Supplementary material for: Non-Compliance To Social Distancing During COVID-19 Pandemic: A Comparative Cross-Sectional Study Between the Developed and Developing Countries
Source: Research Square preprint supplement (doi:10.21203/rs.3.rs-717867/v1), 2021-08-17
Supplement: Supplementary file 1 [file afeb88af6ef49c63aaa49ca7.docx]

**Additional file 1: Factors associated with compliance rate among population in developed and developing countries**

|  | **Compliance to hand washing (%)**  **N=394** | **Compliance to wearing mask (%)**  **N= 394** | **Compliance to keeping safe distance (%)**  **N=394** | **Compliance to decreasing frequency of going out (%)**  **N=394** |
| --- | --- | --- | --- | --- |
| **Demographics** | | | | |
| **Gender**  Male  Female  *P value* | 183 (46.4)  120 (30.5)  0.265 | 200 (50.8)  141 (35.8)  0.812 | 185 (46.9)  119 (30.2)  0.144 | 187 (47.5)  130 (32.9)  0.93 |
| **Age (years)**  *Youth (18-24)*  *Adults (25-64)*  *Seniors (>64)*  *P value* | 146 (37.1)  151 (38.3)  6 (1.52)  0.179 | 163 (41.4)  169 (42.9)  9 (2.30)  0.668 | 135 (34.3)  162 (41.2)  7 (1.77)  **0.003** | 148 (37.6)  158 (40.1)  11 (2.79)  0.126 |
| **Countries**  *Developed*  *Developing*  *P value* | 124 (31.5)  179 (45.4)  0.240 | 141 (35.8)  200 (50.8)  **0.038** | 139 (35.3)  165 (41.9)  **<0.001** | 134 (34.0)  183 (46.4)  **0.016** |
| **Developed countries (N=155)** | | | | |
| **Income**  *< Rs.200,000/USD 4500*  *Rs.200,000-400,000/ USD 4500-5500*  *> Rs.400,000/USD 5,500*  *P value* | 75 (48.4)  15 (9.68)  34 (21.9)  0.413 | 88 (56.8)  17 (11.0)  36 (22.3)  0.606 | 86 (55.5)  17 (11.0)  36 (22.3)  0.684 | 85 (54.8)  15 (9.68)  34 (21.9)  0.273 |
| **Education**  *High school*  *College degree*  *Post-graduation*  *P value* | 22 (14.2)  58 (37.4)  44 (28.4)  0.976 | 28 (18.1)  65 (41.9)  48 (31.0)  0.156 | 26 (16.8)  63 (40.6)  50 (32.3)  0.684 | 23 (14.8)  64 (41.3)  47 (30.3)  0.654 |
| **Self-COVID-19 positivity**  *Yes*  *No*  *P value* | 11 (7.10)  113 (72.9)  0.664 | 11 (7.10)  130 (83.9)  0.404 | 11 (7.10)  128 (82.6)  0.531 | 10 (6.45)  124 (80.0)  0.294 |
| **Self-Comorbidities present**  *Yes*  *No*  *P value* | 34 (21.9)  90 (58.1)  0.593 | 38 (24.5)  103 (66.5)  0.208 | 39 (25.2)  100 (64.5)  0.789 | 38 (24.5)  96 (61.9)  0.984 |
| **Family members contracted COVID-19**  *Yes*  *No*  *P value* | 36 (23.2)  88 (56.8)  0.473 | 40 (25.8)  101 (65.2)  0.580 | 37 (23.9)  102 (65.8)  0.357 | 40 (25.8)  94 (60.6)  0.139 |
| **Family members with comorbidities**  *Yes*  *No*  *P value* | 19 (12.3)  105 (67.7)  0.072 | 17 (11.0)  124 (80.0)  0.318 | 19 (12.3)  120 (77.4)  0.402 | 18 (11.6)  116 (74.8)  0.619 |
| **Developing countries (N=239)** | | | | |
| **Income**  *< Rs.200,000/USD 4500*  *Rs.200,000-400,000/ USD 4500-5500*  *> Rs.400,000/USD 5,500*  *P value* | 103 (43.1)  39 (25.2)  37 (15.5)  0.301 | 117 (50.0)  43 (18.0)  40 (16.7)  0.426 | 99 (41.4)  35 (14.6)  31 (13.0)  0.986 | 106 (44.4)  41 (17.2)  36 (15.1)  0.404 |
| **Education**  *High school*  *College degree*  *Post-graduation*  *P value* | 69 (29.0)  61 (25.5)  49 (20.5)  0.597 | 75 (31.4)  68 (28.5)  57 (23.8)  0.512 | 57 (23.8)  57 (23.8)  51 (21.3)  0.225 | 66 (27.6)  66 (27.6)  51 (21.3)  0.908 |
| **Self-COVID-19 positivity**  *Yes*  *No*  *P value* | 33 (13.8)  146 (61.1)  0.064 | 36 (15.1)  164 (68.6)  **0.044** | 31 (13.0)  134 (56.1)  0.068 | 25 (10.5)  158 (66.1)  0.087 |
| **Self-Comorbidities present**  *Yes*  *No*  *P value* | 92 (38.5)  87 (36.4)  0.280 | 102 (42.7)  98 (41.0)  0.254 | 82 (34.3)  83 (34.7)  0.881 | 85 (35.6)  98 (41.0)  0.102 |
| **Family members contracted COVID-19**  *Yes*  *No*  *P value* | 57 (23.8)  122 (51.0)  0.831 | 66 (27.6)  134 (56.1)  0.558 | 55 (23.0)  110 (46.0)  0.582 | 55 (23.0)  128 (53.6)  0.196 |
| **Family members with comorbidities**  *Yes*  *No*  *P value* | 74 (31.0)  104 (43.5)  **0.035** | 82 (34.3)  118 (49.4)  **0.035** | 64 (26.8)  101 (42.3)  0.735 | 68 (28.5)  115 (48.1)  0.598 |
